Abstract  
Paper Sessions

Thursday, November 14, 3:30 pm – 4:30 pm

DIVERSITY AND CULTURAL CONSIDERATIONS IN ASSESSMENT-4

**African Enculturation and Performance on the African Neuropsychological Battery**

*Ikanga J, Braggs P, Howard C, Stringer A*

**Objective:** To test a core assumption of the African Neuropsychology Battery (ANB) that greater African enculturation is associated with better performance. **Method:** Subjects were 27 African immigrants to the U.S. [mean age = 39 (SD = 11.5), mean education = 16.3 years (SD = 2.9)], 32 African-Americans [mean age = 34.0 (SD = 11.2), mean education = 16.2 (SD = 2.5)], and 21 U.S. Caucasians [mean age = 45.7 (SD = 13.8), mean education = 17.2 (SD = 2.3)]. All subjects completed a questionnaire on familiarity with elements of African culture. The ANB was administered one-on-one, by trained technicians, in English, in a single session. ANB tests measured visuospatial perception, naming, memory, and abstract reasoning utilizing content drawn from sub-Saharan African cultures. **Results:** Groups differed significantly in age ( $p < .05$ ), but not education or gender, and age was used as a covariate in subsequent group comparisons. African immigrants showed highest African enculturation, followed by African Americans, and Caucasians [ $F(2, 74) = 36.16, p < .000$ ], with all groups differing significantly from one another in post-hoc comparisons ( $p < .02$ ). African enculturation correlated significantly only with ability to identify pictures of African fruits (Pearson  $r = .58, p < .001$ ) and objects ( $r = .25, p < .03$ ). Analysis of Covariance followed by Bonferroni post-hoc comparisons confirmed that African immigrants were superior to Caucasians ( $p < .001$ ) and African-Americans ( $p < .001$ ) in identifying fruits, with the latter two groups not differing significantly from one another. African immigrants were superior to Caucasians in object identification ( $p < .05$ ), but did not differ significantly from African-Americans. **Conclusions:** African enculturation influences performance on some ANB tests and results support the potential of the ANB to assess performance in a less culturally-biased manner in African immigrants.
